## CORRECTION

# Correction: Disentangling semantic and response learning effects in color-word contingency learning

Sebastian Geukes, Dirk Vorberg, Pienie Zwitserlood

There are errors in Figs 1, 3, 4 and 8. In Fig 1, the numbers 3 and 4 are missing on the response box and a 5 is missing in “150 ms”. In Figs 3 and 4, the error bars in conditions ColPos and ColPosFix are distorted. In Fig 8, there is an error in the legend. The authors have provided corrected versions here.

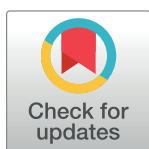

## OPEN ACCESS

**Citation:** Geukes S, Vorberg D, Zwitserlood P (2019) Correction: Disentangling semantic and response learning effects in color-word contingency learning. PLoS ONE 14(6): e0218222. <https://doi.org/10.1371/journal.pone.0218222>

**Published:** June 6, 2019

**Copyright:** © 2019 Geukes et al. This is an open access article distributed under the terms of the [Creative Commons Attribution License](https://creativecommons.org/licenses/by/4.0/), which permits unrestricted use, distribution, and reproduction in any medium, provided the original author and source are credited.

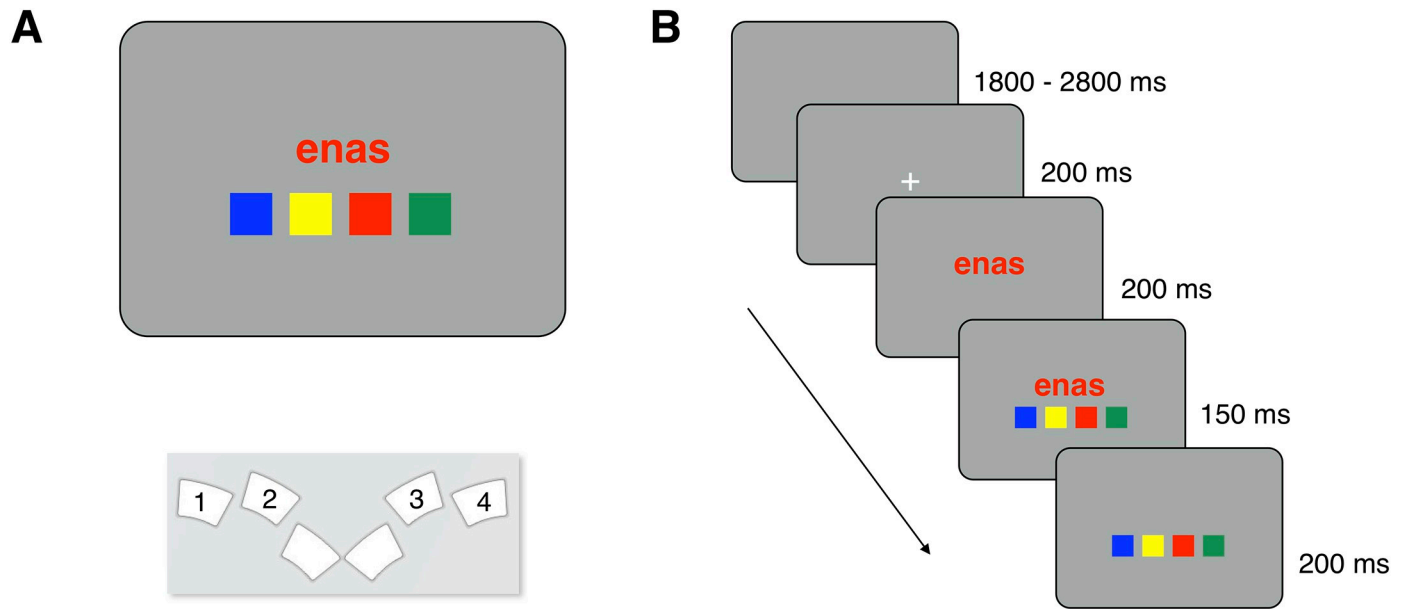

**Fig 1. Stimulus display, spatial arrangement of response buttons, and trial timing.** Panel A shows the typical stimulus display and response button layout in Experiments 1, 2, and 4. Panel B illustrates a typical trial. Numbers in Panel A schematically indicate which buttons of the response box were used in the experiments; actually, buttons were not labelled. The same timing of stimulus elements applied in all four experiments.

<https://doi.org/10.1371/journal.pone.0218222.g001>

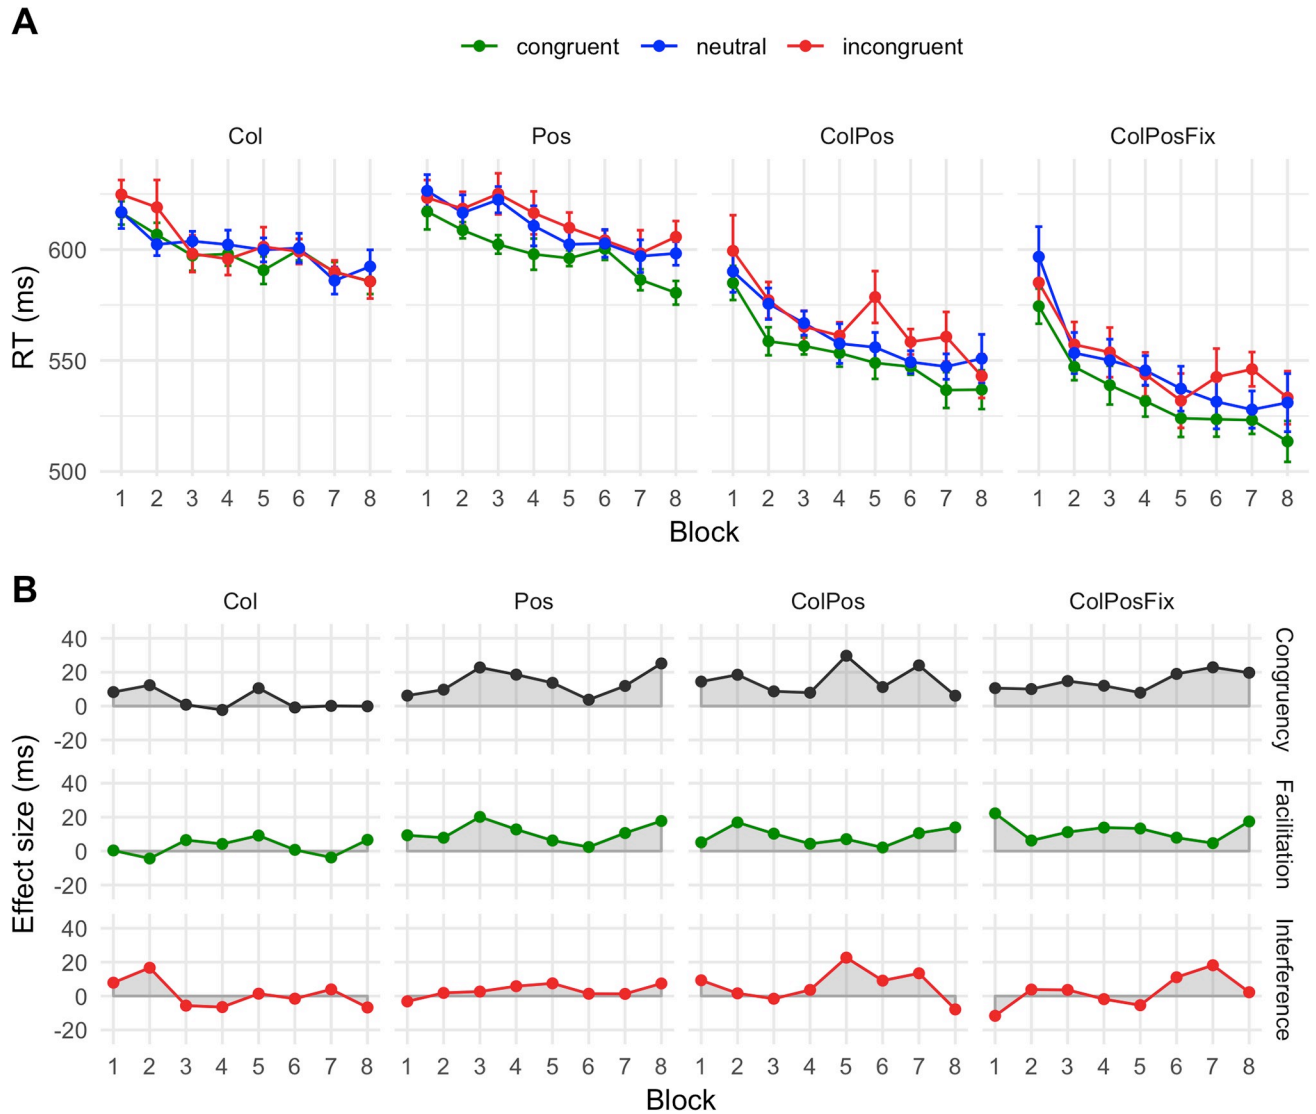

**Fig 3. Mean response times (A) and net effects (B) in Experiment 1.** Error bars are within-participant standard errors of the mean. Abbreviations: Col = color contingency, Pos = response position contingency, ColPos = both contingencies, ColPosFix = both contingencies plus fixed spatial arrangement of the response cues. Effects: Congruency =  $RT_{incongruent} - RT_{congruent}$ , Facilitation =  $RT_{neutral} - RT_{congruent}$ , Interference =  $RT_{incongruent} - RT_{neutral}$ .

<https://doi.org/10.1371/journal.pone.0218222.g002>

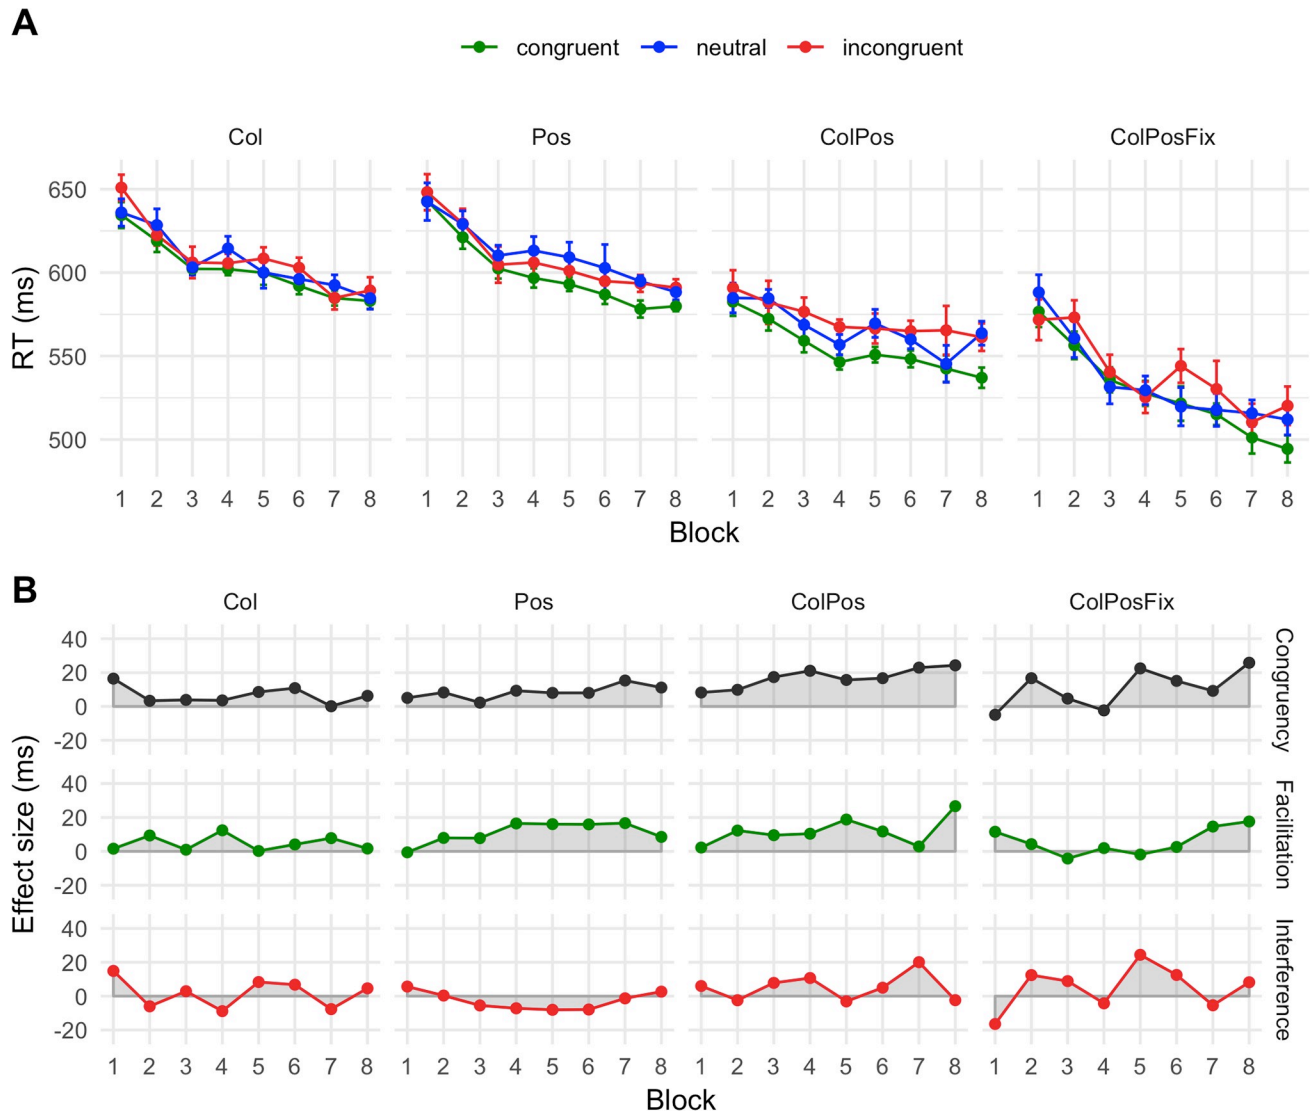

**Fig 4. Mean response times (A) and net effects (B) in Experiment 2.** Participants were informed about the contingency type before each upcoming block. Error bars and abbreviations as in Fig 3.

<https://doi.org/10.1371/journal.pone.0218222.g003>

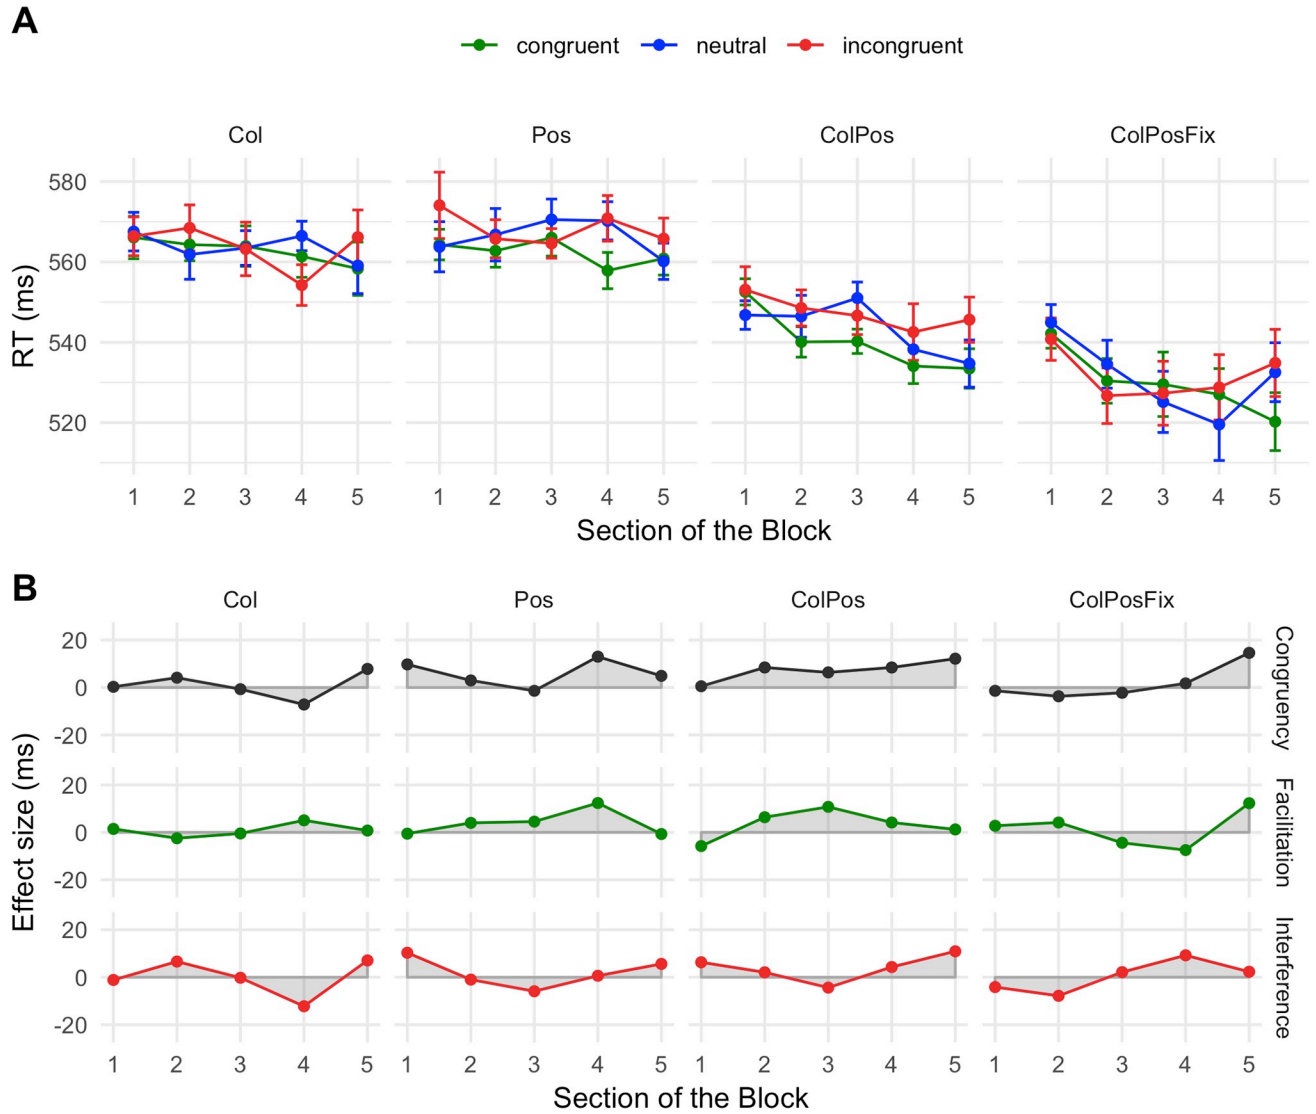

**Fig 8. Mean response times (A) and net effects (B) in Experiment 4.** Error bars and abbreviations as in Fig 3.

<https://doi.org/10.1371/journal.pone.0218222.g004>

### Reference

1. Geukes S, Vorberg D, Zwitserlood P (2019) Disentangling semantic and response learning effects in color-word contingency learning. *PLoS ONE* 14(5): e0212714. <https://doi.org/10.1371/journal.pone.0212714> PMID: 31059506
